# Supplementary material for: Exaptation of Bornavirus-Like Nucleoprotein Elements in Afrotherians
Source: PLoS Pathog. 2016 Aug 12;12(8):e1005785. doi: 10.1371/journal.ppat.1005785 (PMC4982594; doi:10.1371/journal.ppat.1005785)
Supplement: S6 Table — (XLSX) [file ppat.1005785.s021.xlsx]

## Sheet: Sheet1
S6 Table. Celluer localization of laEBLNs predicted by PSPORT II [22].
	Reliability (%)
	Nucleus	Cytoplasmic	Peroxisome	Mitochondria	Endoplasmic reticulum	Golgi
laEBLN-1v1	34.8	47.8	-	8.7	4.3	4.3
laEBLN-2v1	34.8	47.8	-	8.7	4.3	4.3
laEBLN-1v2	78.3	17.4	4.3	-	-	-
laEBLN-2v2	78.3	17.4	4.3	-	-	-
