# Supplementary material for: Exaptation of Bornavirus-Like Nucleoprotein Elements in Afrotherians
Source: PLoS Pathog. 2016 Aug 12;12(8):e1005785. doi: 10.1371/journal.ppat.1005785 (PMC4982594; doi:10.1371/journal.ppat.1005785)
Supplement: S7 Table — (XLSX) [file ppat.1005785.s022.xlsx]

## Sheet: Sheet1
S7 Table. Nucleotide positions of the sequences used for dot-plot analysis in S3 Fig.
gene	accession number	nucleotide position
laEBLN-1v1	AAGU03015684	84..2851
laEBLN-2v1	AAGU03015682	7637..10404
Tm/AHIN01138425	AHIN01138425	99372..102022
Tm/AHIN01138426	AHIN01138426	23731..26384
Pc/ABRQ02082163	ABRQ02082163	59416..62066
Pc/ABRQ02082168	ABRQ02082168	7111..9752
Oa/ALYB01141940	ALYB01141940	12479..15129
Oa/ALYB01141942	ALYB01141942	12804..15454
Ee/AMGZ01016176	AMGZ01016176	12192-14662
Ee/AMGZ01016178	AMGZ01016178	1..2403
Ca/AMDV01031468	AMDV01031468	154316..156957
